# Supplementary material for: Age and CMV-Infection Jointly Affect the EBV-Specific CD8+ T-Cell Repertoire
Source: PubMed Central journal article supplement (PMC9261403; doi:10.3389/fragi.2021.665637), 2021-04-29
Supplement: Data_Sheet_2.pdf [file Data_Sheet_2.pdf]

| Donor | Age | M/F | Number of UMIs | CDR3 $\beta$         | V $\beta$ | J $\beta$ |
|-------|-----|-----|----------------|----------------------|-----------|-----------|
| 1     | 29  | F   | 3              | CASSPGGGGNEQFF       | VB7-9     | JB2-1     |
| 3     | 43  | M   | 2              | CASSPDLAGGPITSEQFF   | VB4-3     | JB2-1     |
| 4     | 51  | M   | 3              | CASSLAPGATNEKLFF     | VB7-6     | JB1-4     |
|       |     |     | 14             | CASSYSIPDGVFDEQFF    | VB6-5/6   | JB2-1     |
| 5     | 42  | M   | 1              | CASTRGGLTSSYNEQFF    | VB12-3/4  | JB2-1     |
| 6     | 29  | F   | 2              | CASSYATGTAYGYTF      | VB6-5/6   | JB1-2     |
| 10    | 30  | F   | 2              | CASSSANYGYTF         | VB12-3    | JB1-2     |
| 11    | 30  | F   | 1              | CAGSFGTADTGELFF      | VB7-7     | JB2-2     |
|       |     |     | 1              | CAISDPPVAGAYEQFF     | VB10-3    | JB2-1     |
|       |     |     | 1              | CAISDPPVAGAYEQYF     | VB10-3    | JB2-7     |
|       |     |     | 2              | CAISESGGWQFF         | VB10-3    | JB2-1     |
|       |     |     | 1              | CASSGGLAAPGTQYF      | VB6-5/6   | JB2-3     |
|       |     |     | 1              | CASSGTGTGELFF        | VB6-1     | JB2-2     |
|       |     |     | 1              | CASSHPLAANTGELFF     | VB4-3     | JB2-2     |
|       |     |     | 1              | CASSLAGANEQFF        | VB7-9     | JB2-1     |
|       |     |     | 1              | CASSLDDEQFF          | VB12-3/4  | JB2-1     |
|       |     |     | 1              | CASSLFRVQPQHF        | VB6-3     | JB1-5     |
|       |     |     | 1              | CASSPLSGANVLTf       | VB7-6     | JB2-6     |
|       |     |     | 1              | CASSPQVAGNEQFF       | VB7-9     | JB2-1     |
|       |     |     | 1              | CASSQDPTSNEQFF       | VB4-2     | JB2-1     |
|       |     |     | 1              | CASSYVQGINQPQHF      | VB6-2     | JB1-5     |
|       |     |     | 1              | CATAGRDGQPQHF        | VB24-1    | JB1-5     |
|       |     |     | 1              | CSAEGELANLDEQFF      | VB20-1    | JB2-1     |
|       |     |     | 3              | CSAPREGTSYGYTF       | VB20-1    | JB1-2     |
|       |     |     | 1              | CSARGGGSYNEQFF       | VB20-1    | JB2-1     |
|       |     |     | 1              | CSARGGRAADDYGFTL     | VB20-1    | JB1-2     |
|       |     |     | 1              | CSAWRAGALFV          | VB20-1    | JB2-2     |
|       |     |     | 1              | CSAWRSGELFF          | VB20-1    | JB2-2     |
|       |     |     | 1              | CSVDPDTGGNTEAFF      | VB29-1    | JB1-1     |
|       |     |     | 1              | CSVGGLRTDTQYF        | VB29-1    | JB2-3     |
|       |     |     | 1              | CSVGPTGANQPQHF       | VB29-1    | JB1-5     |
|       |     |     | 3              | CSVVVVVGNTGELFF      | VB29-1    | JB2-2     |
| 14    | 75  | F   | 1              | CAISESGGTDQYF        | VB10-3    | JB2-3     |
|       |     |     | 6              | CASSLAPGTTNEKLFF     | VB7-6     | JB1-4     |
|       |     |     | 1              | CASSLHTTSGRAINTDTQYF | VB11-1    | JB2-3     |
|       |     |     | 1              | CASSPLYADSHYGYTF     | VB6-5/6   | JB1-2     |
|       |     |     | 1              | CASSSANYGYTF         | VB12-3/4  | JB1-2     |
|       |     |     | 92             | CASSSVTEAFF          | VB12-3/4  | JB1-2     |
|       |     |     | 1              | CASSSVTEPFF          | VB12-3/4  | JB1-1     |
|       |     |     | 1              | CASSVLPQQGVDDQFF     | VB4-1     | JB2-1     |
|       |     |     | 7              | CASSVVNEQFF          | VB12-3/4  | JB2-1     |
|       |     |     | 3              | CASSYQTGTGVYGYTF     | VB6-5/6   | JB1-2     |
| 17    | 68  | M   | 2              | CASSLEVTGELFF        | VB7-3     | JB2-2     |
|       |     |     | 1              | CASSSVNEQFF          | VB12-3/4  | JB2-1     |
|       |     |     | 1              | CASSTVGGRDYGYTF      | VB2       | JB1-2     |
|       |     |     | 1              | CASSYATGASYGYTF      | VB6-5/6   | JB1-2     |
|       |     |     | 1              | CAWQSPGGDNEQFF       | VB7-8     | JB2-1     |
| 18    | 76  | M   | 4              | CSASTTSGAPSEQFF      | VB20-1    | JB2-1     |
| 19    | 67  | M   | 1              | CASISGHGYEEQYF       | VB27      | JB2-7     |
|       |     |     | 194            | CASISGQGYEEQYV       | VB27      | JB2-7     |
|       |     |     | 1              | CASSFRTVSSYEQYF      | VB7-8     | JB2-7     |
|       |     |     | 1              | CASSLAPEDLNKVLFF     | VB7-6     | JB1-4     |
|       |     |     | 140            | CASSLAPGATNEKLFF     | VB7-6     | JB1-4     |

|           |    |   |     |                      |          |       |
|-----------|----|---|-----|----------------------|----------|-------|
|           |    |   | 1   | CASSPLGGAGGDTQYF     | VB9      | JB2-3 |
|           |    |   | 1   | CASSQVWGSGEKLF       | VB3-1    | JB1-4 |
|           |    |   | 3   | CASSTRDIGFYEQYF      | VB7-9    | JB2-7 |
|           |    |   | 7   | CSVEGSSAGRTLHEQYF    | VB29-1   | JB2-7 |
| <b>20</b> | 68 | F | 3   | CASSALWPTNEKLF       | VB27     | JB1-4 |
|           |    |   | 7   | CASSLAPGATNEKLF      | VB7-6    | JB1-4 |
| <b>21</b> | 65 | F | 1   | CASGLLLGGADTQYF      | VB28     | JB2-3 |
|           |    |   | 1   | CASSLLGGADAQYF       | VB28     | JB2-3 |
|           |    |   | 156 | CASSLLGGADTQYF       | VB28     | JB2-3 |
|           |    |   | 2   | CASSQTGFNQPHF        | VB25-1   | JB1-5 |
| <b>22</b> | 76 | M | 28  | CASRVGTGTAREQFF      | VB6-5/6  | JB2-1 |
|           |    |   | 10  | CASSGGGTGAYEQYF      | VB4-3    | JB1-6 |
|           |    |   | 116 | CASSQEGNLGQGMGYSPLHF | VB4-3    | JB1-6 |
|           |    |   | 1   | CASSQEGNLGQGMGYSPLRF | VB4-3    | JB1-6 |
|           |    |   | 1   | CASSQEVNLGQGMGFSPLLF | VB4-3    | JB1-6 |
|           |    |   | 3   | CASSSANYGYTF         | VB12-3/4 | JB1-2 |
|           |    |   | 31  | CASSVVGLAFF          | VB12-3/4 | JB1-1 |
|           |    |   | 3   | CAWVPGTGGFQAFF       | VB30     | JB1-1 |
| <b>23</b> | 81 | M | 3   | CASHTSGALYNEQFF      | VB27     | JB2-1 |
|           |    |   | 3   | CASSLAPGATNEKLF      | VB7-6    | JB1-4 |
|           |    |   | 11  | CSARREFGSGSLSYNEQFF  | VB20-1   | JB2-1 |

**Supplementary Table 1: CMV<sup>A2-NLV</sup>-specific TCR sequences**

| Donor | Age              | M/F      | Number of UMIs | CDR3 $\beta$      | V $\beta$ | J $\beta$ |
|-------|------------------|----------|----------------|-------------------|-----------|-----------|
| 24    | 41               | F        | 1              | CAIRGIEDRGVEAFF   | VB10-3    | JB1-1     |
|       |                  |          | 1              | CASEGDTQYF        | VB19      | JB2-3     |
|       |                  |          | 1              | CASRDRTGLQPQHF    | VB6-5/6   | JB1-5     |
|       |                  |          | 1              | CASSDLPQSSGNTIYF  | VB2       | JB1-3     |
|       |                  |          | 1              | CASSESTGVRLYEQFF  | VB10-1    | JB2-1     |
|       |                  |          | 1              | CASSLQSLADSYEQYF  | VB12-3/4  | JB2-7     |
|       |                  |          | 2              | CASSLVGGNIQYF     | VB7-8     | JB2-4     |
|       |                  |          | 1              | CASSPGTGTYTEAFF   | VB6-5/6   | JB1-1     |
|       |                  |          | 1              | CASSRRSRDQYEQYF   | VB7-9     | JB2-7     |
|       |                  |          | 1              | CASSSRAGYNEQFF    | VB14      | JB2-1     |
|       |                  |          | 1              | CASSVERWESNEQFF   | VB9       | JB2-1     |
|       |                  |          | 1              | CATSRVVTGTETQYF   | VB15      | JB2-5     |
|       |                  |          | 1              | CSARDLDGGELFF     | VB20-1    | JB2-2     |
|       |                  |          | 12             | CSARDQTGNGYTF     | VB20-1    | JB1-2     |
|       |                  |          | 1              | CSVAGLAGAPGFEQYF  | VB29-1    | JB2-7     |
|       |                  |          | 1              | CSVGQGWNPQHF      | VB29-1    | JB1-5     |
|       |                  |          | 2              | CSVLRSTGELFF      | VB29-1    | JB2-2     |
|       |                  |          | 25             | 42                | F         | 1         |
| 1     | CASSSDRLLAKNIQYF | VB2      |                |                   |           | JB2-4     |
| 1     | CASSVGLTSGDEQFF  | VB9      |                |                   |           | JB2-1     |
| 5     | CASSYGQQETQYF    | VB12-3/4 |                |                   |           | JB2-5     |
| 2     | CSARAGTGNTIYF    | VB20-1   |                |                   |           | JB1-3     |
| 2     | CSARDRMGNTIYF    | VB20-1   |                |                   |           | JB1-3     |
| 4     | CSARDRTGNGYTF    | VB20-1   |                |                   |           | JB1-2     |
| 1     | CSARDRVGNTIYF    | VB20-1   |                |                   |           | JB1-3     |
| 2     | CSARDSIGNGYTF    | VB20-1   |                |                   |           | JB1-2     |
| 1     | CSARDWIGNGYTF    | VB20-1   |                |                   |           | JB1-2     |
| 1     | CSAREGTGNTIYF    | VB20-    |                |                   |           | JB1-3     |
| 1     | CSARERTGNTIYF    | VB20-1   |                |                   |           | JB1-3     |
| 2     | CSARSGTGNTIYF    | VB20-1   |                |                   |           | JB1-3     |
| 2     | CSARVPPGNTIYF    | VB20-1   |                |                   |           | JB1-3     |
| 5     | CSVGQGGTNEKLFF   | VB29-1   |                |                   |           | JB1-4     |
| 3     | CSVGSGGTNEKLFF   | VB29-1   |                |                   |           | JB1-4     |
| 7     | CSVGTGGTNEKLFF   | VB29-1   | JB1-4          |                   |           |           |
| 26    | 49               | M        | 1              | CSAYRGRPETQYF     | VB20-1    | JB2-5     |
| 27    | 50               | M        | 1              | CAISELAGGSSYNEQFF | VB10-3    | JB2-1     |
|       |                  |          | 1              | CAISSYLSSSNQPQHF  | VB10-3    | JB1-5     |
|       |                  |          | 1              | CASGLLQVQETQYF    | VB12-5    | JB2-5     |
|       |                  |          | 1              | CASRAGSDEKLFF     | VB7-9     | JB1-4     |
|       |                  |          | 1              | CASRPEPGQGVNEQYF  | VB3-1     | JB2-7     |
|       |                  |          | 1              | CASRTQALSSYNSPLHF | VB27      | JB1-6     |
|       |                  |          | 1              | CASRTSGGSGELFF    | VB7-9     | JB2-2     |
|       |                  |          | 1              | CASSAGGPEVAEQYF   | VB10-2    | JB2-7     |
|       |                  |          | 3              | CASSDAQVLPSEQYF   | VB2       | JB2-7     |
|       |                  |          | 1              | CASSEGGGANYGYTF   | VB2       | JB1-2     |
|       |                  |          | 1              | CASSFGGGPYNEQFF   | VB12-3/4  | JB2-1     |
|       |                  |          | 1              | CASSKDYEYQYF      | VB14      | JB2-7     |
|       |                  |          | 1              | CASSLDGATQYF      | VB11-2    | JB2-3     |
|       |                  |          | 1              | CASSLGEQDIQYF     | VB4-      | JB2-4     |
|       |                  |          | 2              | CASSLGGPLGEQYF    | VB7-8     | JB2-7     |
|       |                  |          | 1              | CASSLGGQGFYGYTF   | VB7-9     | JB1-2     |
| 1     | CASSLGGTGDHEQYF  | VB12-3/4 | JB2-7          |                   |           |           |

|           |    |   |   |                     |          |       |
|-----------|----|---|---|---------------------|----------|-------|
|           |    |   | 1 | CASSLLSGNEQFF       | VB5-5    | JB2-1 |
|           |    |   | 1 | CASSLSGHYNEQFF      | VB27     | JB2-1 |
|           |    |   | 1 | CASSLSGVDTQYF       | VB27     | JB2-3 |
|           |    |   | 1 | CASSLSIPRSSYEQYF    | VB27     | JB2-7 |
|           |    |   | 1 | CASSLTSGGAGQYF      | VB5-1    | JB2-5 |
|           |    |   | 1 | CASSLVAGPNEQYF      | VB7-9    | JB2-7 |
|           |    |   | 1 | CASSLVALSGNTIYF     | VB7-9    | JB1-3 |
|           |    |   | 1 | CASSLVSGEYNEQFF     | VB5-1    | JB2-1 |
|           |    |   | 1 | CASSPDRVYGYTF       | VB12-3/4 | JB1-2 |
|           |    |   | 2 | CASSPDTNSPLHF       | VB3-1    | JB1-6 |
|           |    |   | 1 | CASSPGTGGFYEQYF     | VB27     | JB2-7 |
|           |    |   | 1 | CASSPPVPEAFF        | VB7-9    | JB1-1 |
|           |    |   | 1 | CASSPQGTEAFF        | VB5-1    | JB1-1 |
|           |    |   | 1 | CASSPRLAGGTDQYF     | VB5-1    | JB2-3 |
|           |    |   | 1 | CASSPTGDDYGYTF      | VB10-2   | JB1-2 |
|           |    |   | 1 | CASSQKQGRSADTQYF    | VB3-1    | JB2-3 |
|           |    |   | 1 | CASSSMHSGANVLTF     | VB19     | JB2-6 |
|           |    |   | 1 | CASSSRPGTTGELFF     | VB9      | JB2-2 |
|           |    |   | 1 | CASSYPTGQAPDTQYF    | VB7-9    | JB2-3 |
|           |    |   | 1 | CASSYSNTGHYGYTF     | VB6-5/6  | JB1-2 |
|           |    |   | 1 | CATSDSTGNQPQHF      | VB24-1   | JB1-5 |
|           |    |   | 1 | CATSTGTGGQPQHF      | VB19     | JB1-5 |
|           |    |   | 1 | CSARDPGTDYEQYF      | VB20-1   | JB2-7 |
|           |    |   | 1 | CSARHLWPDGGSGANVLTF | VB20-1   | JB2-6 |
|           |    |   | 1 | CSARREGPITGELFF     | VB20-1   | JB2-2 |
|           |    |   | 1 | CSARRDTEAFF         | VB20-1   | JB1-1 |
|           |    |   | 1 | CSASSSGELFF         | VB20-1   | JB2-2 |
|           |    |   | 1 | CSVEGTGDEQYF        | VB29-1   | JB2-7 |
|           |    |   | 1 | CSVGAGGTNEKLFF      | VB29-1   | JB1-4 |
|           |    |   | 1 | CSVGTGGTNEKLFF      | VB29-1   | JB1-4 |
| <b>28</b> | 24 | F | 2 | CASTPRLAGGEEQYF     | VB28     | JB2-7 |
| <b>29</b> | 21 | F | 3 | CSARDQTGNGYTF       | VB20-1   | JB1-2 |
| <b>30</b> | 24 | F | 1 | CASNQIEGTEAFF       | VB9      | JB1-1 |
|           |    |   | 3 | CASSRPGSNQPQHF      | VB7-9    | JB1-5 |
|           |    |   | 2 | CASSSQLTNTEAFF      | VB9      | JB1-1 |
| <b>31</b> | 28 | F | 2 | CAISESVGRDSGYTF     | VB10-3   | JB1-2 |
|           |    |   | 1 | CASNSAGRAGETQYF     | VB27     | JB2-5 |
|           |    |   | 1 | CASSFGRANEQFF       | VB12-3/4 | JB2-1 |
|           |    |   | 2 | CASSFSGRVGTYNEQFF   | VB11-2   | JB2-1 |
|           |    |   | 1 | CASSGTTYEQYF        | VB28     | JB2-7 |
|           |    |   | 1 | CASSLDPLPRGRGYTF    | VB5-1    | JB1-2 |
|           |    |   | 2 | CASSLDPQGVGNQPQHF   | VB5-1    | JB1-5 |
|           |    |   | 1 | CASSLITSYGYTF       | VB12-3/4 | JB1-2 |
|           |    |   | 1 | CASSLRDGEQFF        | VB11-3   | JB2-1 |
|           |    |   | 1 | CASSLSQGGEKLFF      | VB27     | JB1-4 |
|           |    |   | 1 | CASSPGPTRDYEQYV     | VB5-1    | JB2-7 |
|           |    |   | 1 | CASSPRNEETQYF       | VB18     | JB2-5 |
|           |    |   | 1 | CASSPSRGETQYF       | VB7-2    | JB2-5 |
|           |    |   | 1 | CASSPTQGARYGYTF     | VB5-1    | JB1-2 |
|           |    |   | 1 | CASSQEGLEETQYF      | VB4-1    | JB2-5 |
|           |    |   | 1 | CASSRPGMRGQNIQYF    | VB7-2    | JB2-4 |
|           |    |   | 1 | CASSSGTSGTEQYF      | VB5-1    | JB2-7 |
|           |    |   | 1 | CASSSRETYEQYF       | VB11-1   | JB2-7 |
|           |    |   | 2 | CASSVDPRGNEQFF      | VB9      | JB2-1 |
|           |    |   | 1 | CSAMRGTGRYEQYF      | VB20-1   | JB2-7 |
|           |    |   | 1 | CSAPPRSYSYSSYNEQFF  | VB20-1   | JB2-1 |
|           |    |   | 1 | CSARDGRASGANVLTF    | VB20-1   | JB2-6 |

|           |    |   |    |                      |          |       |
|-----------|----|---|----|----------------------|----------|-------|
|           |    |   | 2  | CSARDRIGNGYTF        | VB20-1   | JB1-2 |
|           |    |   | 1  | CSARDRTGNGYTF        | VB20-1   | JB1-2 |
|           |    |   | 1  | CSARVTSIEAFF         | VB20-1   | JB1-1 |
|           |    |   | 1  | CSASPGPGREQFF        | VB20-1   | JB2-1 |
|           |    |   | 1  | CSASRQYTEAFF         | VB20-1   | JB1-1 |
|           |    |   | 1  | CSVGTGGTNEKLEFF      | VB29-1   | JB1-4 |
|           |    |   | 1  | CSVGTGSTEAFF         | VB29-1   | JB1-1 |
| <b>32</b> | 41 | M | 2  | CSARDGTGNGYTF        | VB20-1   | JB1-2 |
| <b>33</b> | 40 | M | 1  | CAISYFLLAGDGTDTQYF   | VB6-5/6  | JB2-3 |
|           |    |   | 1  | CAKEGTNTEAFF         | VB2      | JB1-1 |
|           |    |   | 1  | CASGGDTNYGYTF        | VB28     | JB1-2 |
|           |    |   | 1  | CASIQETQYF           | VB2      | JB2-5 |
|           |    |   | 1  | CASLLRGENTEAFF       | VB2      | JB1-1 |
|           |    |   | 1  | CASRIGGTGDGEQYF      | VB28     | JB2-7 |
|           |    |   | 1  | CASRMGGTGDCELYL      | VB28     | JB2-7 |
|           |    |   | 2  | CASRPGQGIDEQYF       | VB2      | JB2-7 |
|           |    |   | 1  | CASRREGPDTQYF        | VB7-9    | JB2-3 |
|           |    |   | 1  | CASRRSLPEQFF         | VB28     | JB2-1 |
|           |    |   | 1  | CASSAGGHSNQPQHF      | VB3-1    | JB1-5 |
|           |    |   | 1  | CASSASGWRGYTF        | VB6-5/6  | JB1-2 |
|           |    |   | 1  | CASSCGGLNTEAFF       | VB12-3/4 | JB1-1 |
|           |    |   | 1  | CASSDLRTDLSNYGYTF    | VB7-2    | JB1-2 |
|           |    |   | 1  | CASSDRDRAPNQPQHF     | VB2      | JB1-5 |
|           |    |   | 1  | CASSDSRQGADTQYF      | VB6-4    | JB2-3 |
|           |    |   | 1  | CASSEDGMNTEAFF       | VB10-2   | JB1-1 |
|           |    |   | 1  | CASSESQGWTEAFF       | VB10-2   | JB1-1 |
|           |    |   | 10 | CASSFGVSNTEAFF       | VB12-3/4 | JB1-1 |
|           |    |   | 1  | CASSFVNGGAGKFF       | VB28     | JB2-1 |
|           |    |   | 1  | CASSFVVRGQETQYF      | VB5-1    | JB2-5 |
|           |    |   | 1  | CASSHGAWNTEAFF       | VB12-3/4 | JB1-1 |
|           |    |   | 1  | CASSIGAGNSYEQYF      | VB19     | JB2-7 |
|           |    |   | 2  | CASSLDPTGGHHSSYNEQFF | VB11-2   | JB2-1 |
|           |    |   | 2  | CASSLDSSGGYNEQFF     | VB7-6    | JB2-1 |
|           |    |   | 1  | CASSLDVSRTWTGELFF    | VB7-2    | JB2-2 |
|           |    |   | 1  | CASSLEGPDNSPLHF      | VB5-1    | JB1-6 |
|           |    |   | 1  | CASSLGLAGSYNEQFF     | VB5-1    | JB2-1 |
|           |    |   | 2  | CASSLGLGTGELFF       | VB11-2   | JB2-2 |
|           |    |   | 1  | CASSLLTQGPSYEQYF     | VB19     | JB2-7 |
|           |    |   | 1  | CASSLSNNEQFF         | VB5-6    | JB2-1 |
|           |    |   | 1  | CASSPEASGANVLTFF     | VB6-2    | JB2-6 |
|           |    |   | 1  | CASSPGRAYQETQYF      | VB5-1    | JB2-5 |
|           |    |   | 2  | CASSPHGRGSYSYEQYF    | VB18     | JB2-7 |
|           |    |   | 1  | CASSPQQGNTGELFF      | VB19     | JB2-2 |
|           |    |   | 3  | CASSPRAGWHYGYTF      | VB18     | JB1-2 |
|           |    |   | 2  | CASSPRTGVATNYGYTF    | VB7-6    | JB1-2 |
|           |    |   | 1  | CASSPTAESNQETQYF     | VB11-2   | JB2-5 |
|           |    |   | 2  | CASSPTLVTHYGYTF      | VB6-5/6  | JB1-2 |
|           |    |   | 1  | CASSPWGSGYNEKLEFF    | VB13     | JB1-4 |
|           |    |   | 1  | CASSQELGGPRYF        | VB4-2    | JB2-3 |
|           |    |   | 1  | CASSQESGGTEYEYQYF    | VB3-1    | JB2-7 |
|           |    |   | 1  | CASSQGFTDTQYF        | VB3-1    | JB2-3 |
|           |    |   | 1  | CASSQGLAGGSYNEQFF    | VB3-1    | JB2-1 |
|           |    |   | 1  | CASSQPRPGQGSFYGYTF   | VB4-2    | JB1-2 |
|           |    |   | 1  | CASSQSSYNEQFF        | VB4-1    | JB2-1 |
|           |    |   | 4  | CASSQTDIYNEQFF       | VB4-1    | JB2-1 |
|           |    |   | 2  | CASSSGLYEYQYF        | VB11-2   | JB2-7 |
|           |    |   | 1  | CASSSGVSNTEAFF       | VB12-3/4 | JB1-1 |

|           |    |   |   |                      |          |       |
|-----------|----|---|---|----------------------|----------|-------|
|           |    |   | 1 | CASSKQVNEQYF         | VB7-9    | JB2-7 |
|           |    |   | 1 | CASSLRGVSRQYF        | VB11-2   | JB2-3 |
|           |    |   | 2 | CASSPRLAGVVQETQYF    | VB28     | JB2-5 |
|           |    |   | 1 | CASSSTGQSTGELFF      | VB12-3/4 | JB2-2 |
|           |    |   | 1 | CASSYAGFNQPQHF       | VB6-3    | JB1-5 |
|           |    |   | 4 | CASTPGTLNTEAFF       | VB12-3/4 | JB1-1 |
|           |    |   | 1 | CATSDPTSGQETQYF      | VB24-1   | JB2-5 |
|           |    |   | 1 | CATSVDRDQDGETQYF     | VB15     | JB2-5 |
|           |    |   | 1 | CATSVSGGGDTQYF       | VB15     | JB2-3 |
|           |    |   | 1 | CAWSPGPIGTEAFF       | VB30     | JB1-1 |
|           |    |   | 1 | CSARDLAEGFKQYV       | VB20-1   | JB2-7 |
|           |    |   | 1 | CSARDVGGLSYNEQFF     | VB20-1   | JB2-1 |
|           |    |   | 1 | CSARENGDDTEELFF      | VB20-1   | JB2-2 |
|           |    |   | 2 | CSARFVSERYEQYF       | VB20-1   | JB2-7 |
|           |    |   | 1 | CSARPTGDPGNTIYF      | VB20-1   | JB1-3 |
|           |    |   | 8 | CSGTQGAEAFF          | VB29-1   | JB1-1 |
|           |    |   | 1 | CSVLAPLGTGNSTNTGELFF | VB29-1   | JB2-2 |
|           |    |   | 3 | CSVNRGSGELFF         | VB29-1   | JB2-2 |
|           |    |   | 1 | CSWTQGAEAFF          | VB29-1   | JB1-1 |
| <b>34</b> | 52 | M | 1 | CASSDTAVSPGELFF      | VB2      | JB2-2 |
|           |    |   | 1 | CSARDRGLGNTIYF       | VB20-1   | JB1-3 |
|           |    |   | 1 | CSASWGYTEAFF         | VB20-1   | JB1-1 |
| <b>35</b> | 70 | M | 1 | CASSATLTGLNTEAFF     | VB28     | JB1-1 |
|           |    |   | 1 | CASSEAVTRGDTQYF      | VB2      | JB2-3 |
|           |    |   | 1 | CASSEVQGGSPLHF       | VB6-1    | JB1-6 |
|           |    |   | 1 | CASSLGYPGTNQPQHF     | VB12-3/4 | JB1-5 |
|           |    |   | 1 | CASSLSSGIAGEGGELFF   | VB11-1   | JB2-2 |
|           |    |   | 1 | CASSLTVGRDNEQFF      | VB7-3    | JB2-1 |
|           |    |   | 3 | CASSLWRDLAYNEQFF     | VB11-1   | JB2-1 |
|           |    |   | 1 | CASSPITLTGENYGYTF    | VB6-5/6  | JB1-2 |
|           |    |   | 1 | CASSPSPGGTQDTQYF     | VB6-4    | JB2-3 |
|           |    |   | 1 | CASSTPGTSLDTQYF      | VB27     | JB2-3 |
|           |    |   | 1 | CASSYSETQYF          | VB6-5/6  | JB2-5 |
| <b>36</b> | 71 | F | 2 | CSARDQRTLFEQYF       | VB20-1   | JB2-7 |
| <b>37</b> | 68 | F | 2 | CASSVGGEAYEQYF       | VB9      | JB2-7 |
|           |    |   | 1 | CASTGDTLSYEQYF       | VB6-3    | JB2-7 |
| <b>38</b> | 64 | M | 1 | CASSLAGTSTDTQYF      | VB7-2    | JB2-3 |
|           |    |   | 1 | CASSLGTGNHEQFF       | VB12-3/4 | JB2-1 |
|           |    |   | 2 | CASSQSPGGTQYF        | VB14     | JB2-5 |
|           |    |   | 1 | CASSSPGTGTGANVLTFF   | VB7-8    | JB2-6 |
| <b>39</b> | 74 | M | 1 | CRVTRGTHETLFF        | VB29-1   | JB1-4 |
|           |    |   | 5 | CSVGTGGTNEKLFF       | VB29-1   | JB1-4 |
| <b>40</b> | 79 | F | 2 | CASSPGLVAPGEQYF      | VB2      | JB2-7 |
|           |    |   | 1 | CSGRTGAGGYTF         | VB29-1   | JB1-2 |
|           |    |   | 2 | CASSPGLVAPGEQYF      | VB2      | JB2-7 |
| <b>41</b> | 82 |   | 2 | CASSPVGGPTNYGYTF     | VB12-3/4 | JB1-2 |
| <b>42</b> | 70 | F | 1 | CASSAGQIAPGELFF      | VB2      | JB2-2 |
|           |    |   | 2 | CSARDGTGNGYTF        | VB20-1   | JB1-2 |
|           |    |   | 1 | CSARLIDPAGGHQETQYF   | VB20-1   | JB2-5 |
|           |    |   | 4 | CSVGSAGTNEKLFF       | VB29-1   | JB1-4 |
|           |    |   | 1 | CSVSGTGMETQYF        | VB29-1   | JB2-5 |
| <b>43</b> | 60 | F | 1 | CASGDEGASGYTF        | VB9      | JB1-2 |
|           |    |   | 1 | CASSFRGPGNTIYF       | VB28     | JB1-3 |
|           |    |   | 1 | CASSHGSSYNEQFF       | VB7-9    | JB2-1 |
|           |    |   | 1 | CASSLLGEGDTQYF       | VB13     | JB2-3 |
|           |    |   | 1 | CASSLGGGEASYEQYF     | VB4-1    | JB2-7 |

|   |                 |          |       |
|---|-----------------|----------|-------|
| 1 | CASSLSLSSYNEQFF | VB13     | JB2-1 |
| 1 | CASSQDRGITEAFF  | VB4-1    | JB1-1 |
| 1 | CASSGGEDYEQYF   | VB12-3/4 | JB2-7 |
| 3 | CASSLDTSPHEQYF  | VB11-2   | JB2-7 |
| 1 | CSAPIADGAYEQYF  | VB20-1   | JB2-7 |
| 1 | CSARDSGDPGYTF   | VB20-1   | JB1-2 |
| 1 | CSASDAGGPGYAF   | VB20-1   | JB1-2 |
| 1 | CSASHVQGFSYGYTF | VB20-1   | JB1-2 |
| 2 | CSPRPGRGVTEAFF  | VB20-1   | JB1-1 |

---

**Supplementary Table 2A: EBV<sup>A2-GLC</sup>-specific TCR sequences of CMV- individuals**

| Donor | Age           | M/F    | Number of UMIs | CDR3 $\beta$        | V $\beta$ | J $\beta$ |
|-------|---------------|--------|----------------|---------------------|-----------|-----------|
| 1     | 29            | F      | 1              | CAIRSGYSNQPQHF      | VB28      | JB1-5     |
|       |               |        | 1              | CASGRGYEQYF         | VB5-1     | JB2-7     |
|       |               |        | 1              | CASNQLGGGIDTQYF     | VB7-2     | JB2-3     |
|       |               |        | 2              | CASSFSGDPSYEQYF     | VB12-3/4  | JB2-7     |
|       |               |        | 1              | CASSLQVGSSYNEQFF    | VB7-6     | JB2-1     |
|       |               |        | 1              | CASSPALHPSSYNEQFF   | VB7-2     | JB2-1     |
|       |               |        | 1              | CASSPTAGPGSYEQYF    | VB7-6     | JB2-7     |
|       |               |        | 1              | CASSSTRAGGRDYGYTF   | VB28      | JB1-2     |
|       |               |        | 1              | CSARDASTGEQETQYF    | VB20-1    | JB2-5     |
|       |               |        | 1              | CSARKRSSYNEQFF      | VB20-1    | JB2-1     |
| 1     | CSASLGNEQFF   | VB20-1 | JB2-1          |                     |           |           |
| 2     | 49            | F      | 1              | CASSELDPGSTEAF      | VB5-1     | JB1-1     |
|       |               |        | 1              | CASSFSSGDTEAF       | VB28      | JB1-1     |
|       |               |        | 1              | CASSLAVEQFF         | VB7-9     | JB2-1     |
|       |               |        | 1              | CASSLEGQGGTEAF      | VB13      | JB1-1     |
|       |               |        | 1              | CASSLRGPRNSPLHF     | VB7-6     | JB1-6     |
|       |               |        | 1              | CASSQDTRLAVTGELFF   | VB4-3     | JB2-2     |
|       |               |        | 1              | CASSRDRGTGELFF      | VB5-5     | JB2-2     |
|       |               |        | 1              | CATNDRDGPDTQYF      | VB24-1    | JB2-3     |
|       |               |        | 1              | CATSDLTGDEQFF       | VB24-1    | JB2-1     |
|       |               |        | 5              | CSARIGVGNTIYF       | VB20-1    | JB1-3     |
| 5     | CSARVGVGNTIYF | VB20-1 | JB1-3          |                     |           |           |
| 4     | 51            | M      | 1              | CASSLARTQETQYF      | VB7-9     | JB2-5     |
|       |               |        | 1              | CASSLSRGLLNGYTF     | VB27      | JB1-2     |
|       |               |        | 1              | CSVAGDRAEAF         | VB29-1    | JB1-1     |
| 5     | 42            | M      | 1              | CASNQIEGTEAF        | VB9       | JB1-1     |
|       |               |        | 3              | CASSRPGSNQPQHF      | VB7-9     | JB1-5     |
|       |               |        | 2              | CASSSQLTNTEAF       | VB9       | JB1-1     |
| 6     | 29            | F      | 1              | CASSPTSGSIYEQYF     | VB3-1     | JB2-7     |
|       |               |        | 1              | CASSVEGATGSSYEQYF   | VB9       | JB2-7     |
|       |               |        | 3              | CAWRDDGTDQYF        | VB7-8     | JB2-3     |
|       |               |        | 2              | CSARDRGLGNTIYF      | VB20-1    | JB1-3     |
|       |               |        | 2              | CSARDRGMGNTIYF      | VB20-1    | JB1-3     |
|       |               |        | 3              | CSARDRGGVNTIYF      | VB20-1    | JB1-3     |
|       |               |        | 1              | CSVEAGGRVYNEQFF     | VB29-1    | JB2-1     |
|       |               |        | 2              | CSVGAGPTNEKLFF      | VB29-1    | JB1-4     |
| 7     | 27            | F      | 2              | CAISGTGRVDEQFF      | VB10-3    | JB2-1     |
|       |               |        | 1              | CASSQITGDNQPQHF     | VB4-1     | JB1-5     |
|       |               |        | 2              | CASSRTGNNSPLHF      | VB11-1    | JB1-6     |
|       |               |        | 1              | CASSVGSVGATYEQYF    | VB7-6     | JB2-7     |
|       |               |        | 1              | CSARDRALSVYEQYF     | VB20-1    | JB2-7     |
| 8     | 52            | F      | 1              | CAIGTSPSTDTQYF      | VB10-3    | JB2-3     |
|       |               |        | 1              | CASREPYRGSNGGQETQYF | VB2       | JB2-5     |
|       |               |        | 3              | CASRVPLAGAQPELFF    | VB5-1     | JB2-2     |
|       |               |        | 1              | CASSDGRATGELFF      | VB6-1     | JB2-2     |
|       |               |        | 1              | CASSDWDKTGFYEQYF    | VB6-1     | JB2-7     |
|       |               |        | 1              | CASSERQGTTRADEQYF   | VB6-1     | JB2-7     |
|       |               |        | 1              | CASSLEGGTLQETQYF    | VB5-6     | JB2-5     |
|       |               |        | 1              | CASSLGLHSIQGYEQYF   | VB7-9     | JB2-7     |
|       |               |        | 1              | CASSLQGGNYGYTF      | VB27      | JB1-2     |
|       |               |        | 1              | CASSPEELFSYEQYF     | VB9       | JB2-7     |
|       |               |        | 1              | CASSPQDRAGGDEQFF    | VB4-1     | JB2-1     |



|           |    |   |    |                  |          |       |
|-----------|----|---|----|------------------|----------|-------|
|           |    |   | 1  | CASSPYGGDTQYF    | VB12-3/4 | JB2-3 |
|           |    |   | 1  | CASSSPVRDTQYF    | VB7-9    | JB2-3 |
|           |    |   | 1  | CASSWTGGREQFF    | VB7-8    | JB2-1 |
|           |    |   | 4  | CATSRVGGFNEQFF   | VB15     | JB2-1 |
| <b>9</b>  | 45 | M | 1  | CSARDDTNGYTF     | VB20-1   | JB1-2 |
| <b>10</b> | 30 | F | 1  | CSVGSGGTNEKLFF   | VB29-1   | JB1-4 |
| <b>11</b> | 30 | F | 1  | CASSLAIGEQQF     | VB5-4    | JB2-1 |
| <b>12</b> | 48 | F | 1  | CSARDRGLGNTIYF   | VB20-1   | JB1-3 |
| <b>13</b> | 25 | F | 1  | CSVGTGGTNEKLFF   | VB29-1   | JB1-4 |
| <b>14</b> | 74 | F | 1  | CASSLGVGNSNPQHF  | VB7-8    | JB1-5 |
|           |    |   | 1  | CSASQGAQEAF      | VB20-1   | JB1-1 |
|           |    |   | 1  | CSVGTGGTNEKLFF   | VB29-1   | JB1-4 |
| <b>15</b> | 67 | F | 2  | CAGSLAGRTEAFF    | VB7-9    | JB1-1 |
|           |    |   | 1  | CASGVANEQYF      | VB7-8    | JB2-7 |
|           |    |   | 2  | CASSIDGTAYEQYF   | VB19     | JB2-7 |
|           |    |   | 1  | CASSQGGLWGTEAFF  | VB4-3    | JB1-1 |
|           |    |   | 1  | CATSRIAGETQYF    | VB15     | JB2-5 |
|           |    |   | 1  | CAWTVNEKLFF      | VB30     | JB1-4 |
|           |    |   | 1  | CAWTVNEKLLF      | VB30     | JB1-4 |
|           |    |   | 1  | CSVDSGNYNEQFF    | VB29-1   | JB2-1 |
| <b>16</b> | 70 | F | 2  | CAWSFSDIMNTEAFF  | VB30     | JB1-1 |
| <b>17</b> | 68 | F | 2  | CSAATARIETQYF    | VB29-1   | JB2-5 |
| <b>19</b> | 67 | M | 1  | CASSFYEGQGATEQQF | VB11-2   | JB2-1 |
|           |    |   | 6  | CASSLGAGSNYGYTF  | VB27     | JB1-2 |
|           |    |   | 1  | CASSPPSATYEQYF   | VB18     | JB2-7 |
|           |    |   | 1  | CASSQEAEREQFF    | VB4-3    | JB2-1 |
|           |    |   | 12 | CASSTRDIGFYEYQYF | VB7-9    | JB2-7 |
|           |    |   | 1  | CSAPGQGLMNTEAFF  | VB20-1   | JB1-1 |
| <b>20</b> | 68 | F | 4  | CASSAGQVAPGELFF  | VB2      | JB2-2 |
|           |    |   | 3  | CSARDRTGNGYTF    | VB20-1   | JB1-2 |
|           |    |   | 1  | CSAYRGRPETQYF    | VB20-1   | JB2-5 |
|           |    |   | 3  | CSVGTGGTNEKLFF   | VB29-1   | JB1-4 |
| <b>21</b> | 65 | F | 2  | CASSAVLAGEETQYF  | VB12-3/4 | JB2-5 |
|           |    |   | 1  | CASSEGRVAPGEQYF  | VB2      | JB2-7 |
|           |    |   | 1  | CASSEWTGYQPQHF   | VB6-1    | JB1-5 |
|           |    |   | 1  | CASSGTTTNEKLFF   | VB12-3/4 | JB1-4 |
|           |    |   | 1  | CASSLLGGADTQYF   | VB28     | JB2-3 |
|           |    |   | 2  | CASSQDYRAGDEQYF  | VB4-3    | JB2-7 |
|           |    |   | 1  | CASSPTGQANYGYTF  | VB7-9    | JB1-2 |
|           |    |   | 1  | CASSYRTAANEKLFF  | VB6-5/6  | JB1-4 |
|           |    |   | 2  | CASSYSGTVGYTF    | VB27     | JB1-2 |
|           |    |   | 1  | CAWSSRGRAQETQYF  | VB30     | JB2-5 |
|           |    |   | 1  | CSASRSEGSNPQHF   | VB20-1   | JB1-5 |
|           |    |   | 13 | CSVGAGGTNEKLFF   | VB29-1   | JB1-4 |
|           |    |   | 2  | CSVGTGGTNEKLFF   | VB29-1   | JB1-4 |
|           |    |   | 15 | CSVRGEGDTQYF     | VB29-1   | JB2-3 |

**Supplementary Table 2B: EBV<sup>A2-GLC</sup>-specific TCR sequences of CMV+ individuals**
